# Supplementary material for: 5-Diisopropoxyphosphoryl-5-methyl-1-pyrroline N-oxide, DIPPMPO, a crystalline analog of the nitrone DEPMPO: synthesis and spin trapping propertiesElectronic supplementary information (ESI) available: Tables of crystallographic data. See http://www.rsc.org/suppdata/p2/b2/b206909c/
Source: Royal Society of Chemistry journal article supplement (doi:10.1039/b206909c), 2002-11-12
Supplement: tables.doc [file tables.doc]

**This journal is © The Royal Society of Chemistry 2002**

**Supplementary matérial**

**Table S1.** DIPPMPO crystal data, data collection and refinement parameters

| **Cell constants** | |  | | Crystal description as a prism | | |  |  |
| --- | --- | --- | --- | --- | --- | --- | --- | --- |
| cell length a  cell length b  cell length c  cell angle  /   cell volume V  cell formula units Z  cell measurement temperature  cell measurement reflextions used  cell measurement  min /  max | | 14.4667(4) Å  8.2687(3) Å  12.4192(5) Å  90.0 ° / 91.225(2) ° / 90.0  1485.32(9) Å3  4  293(2) °C  2978  3 / 26 | | Crystal size max  crystal size mid  crystal size min  crystal density diffraction  crystal F (000)  absorption coefficient  diffraction ambient temperature | | | 0.6 mm  0.4 mm  0.3 mm  1.177  568  0.188 cm-1  253(2) °C |  |
| **Data collection with CAD 4- diffractomer** | | | **Refinement** | | |  | | |
| radiation  diffraction radiation  wavelength   source  monochromator  diffraction measurement device  diffraction measurement method  diffraction reflection number  with equivalent R  with I/netI  limit min, max, h / k / l   min /  max /  full  diffraction measured fraction   max  reflection number total  number gt reflection threshold expression | MoK type  0.71070  fine-focus sealed tube  graphite  type KappaCCD  'Phi scans'  2978  0.045  0.0286  0, 17/ 0, 10 l /-15, 15  3.28 / 26.36 / 26.36  0.982  2978  2612  >2(I) | | least square structure factor  matrix type  weighting scheme  weighting details  atom sites solution primary  atom sites solution secondary  atom sites solution hydrogens  least square hydrogen treatment  extinction method  number reflection  number parameters  number restraints  R factor all / gt  wR factor ref / gt  goodness of fit ref  restrained S all  shift/su max / su mean  refine diff density max, min  refine diff density rms | | coef Fsqd  full  calculated  1/[2Fo2) +(0.0613P)2 +0.8256P] where P=(Fo2+2Fc2)/3'  direct  difmap  geom  mixed  none  2978  170  0  0.0557 / 0.0469  0.1285 / 0.1215  1.050  1.050  0.002 / 0.000  0.335, -0.347  0.042 | | | |

**data collection with CAD 4- diffractomer radiation of MoK type**

computing data collection ‘KappaCCD (Nonius, 1998)'

computing cell refinement 'Denzo and Scalepak (Otwinowski & Minor, 1997)'

computing data reduction 'Denzo and Scalepak (Otwinowski & Minor, 1997)' computing structure solution 'SIR (Altamore, 1994)' computing structure refinement 'SHELXL-97 (Sheldrick, 1997)'

Audit creation method SHELXL-97

**Table S2.**  Table with final frational atomic coordinates of DIPPMPO

________________________________________________________________________________

Atom Label Fractional Coordinates (with estimated standard deviations in last digit)

x y z

1 P(1) 0.27266(3) 0.40741(6) 0.89898(3)

2 O(2) 0.29950(10) 0.48652(19) 0.99993(11)

3 O(3) 0.19824(9) 0.26881(17) 0.90745(12)

4 O(4) 0.22653(9) 0.52119(17) 0.81204(11)

5 O(6) 0.44466(11) 0.5317(2) 0.77906(18)

6 N(5) 0.44866(11) 0.4025(2) 0.83865(15)

7 C(7) 0.51472(13) 0.3563(3) 0.90203(18)

8 C(8) 0.34311(17) 0.2402(3) 0.72403(17)

9 C(9) 0.36637(12) 0.2925(2) 0.83863(14)

10 C(10) 0.49387(15) 0.2047(3) 0.95787(18)

11 C(11) 0.39972(14) 0.1532(3) 0.91235(18)

12 C(13) 0.10969(15) 0.3025(3) 0.9565(2)

13 C(16) 0.1011(3) 0.1880(8) 1.0490(3)

14 C(17) 0.0362(2) 0.2781(9) 0.8758(4)

15 C(12) 0.25187(15) 0.6927(3) 0.8008(2)

16 C(14) 0.1845(3) 0.7929(3) 0.8628(3)

17 C(15) 0.2487(2) 0.7263(4) 0.6816(3)

18 H(7) 0.57460 0.42260 0.90440

19 H(8A) 0.33110 0.34530 0.67600

20 H(8B) 0.28280 0.15640 0.72630

21 H(8C) 0.39660 0.17800 0.69290

22 H(10A) 0.49570 0.22480 1.03830

23 H(10B) 0.54360 0.12340 0.92910

24 H(11A) 0.35250 0.12740 0.97360

25 H(11B) 0.41620 0.04740 0.85660

26 H(13) 0.11040 0.43450 0.97850

27 H(16A) 0.14840 0.21060 1.10120

28 H(16B) 0.10720 0.08000 1.02230

29 H(16C) 0.04120 0.20080 1.08050

30 H(17A) 0.04320 0.35480 0.81840

31 H(17B) 0.02360 0.29160 0.90670

32 H(17C) 0.04230 0.17080 0.84860

33 H(12) 0.31970 0.70310 0.82610

34 H(14A) 0.10990 0.76080 0.82030

35 H(14B) 0.20280 0.92100 0.84870

36 H(14C) 0.19630 0.75430 0.95090

37 H(15A) 0.28890 0.65650 0.64620

38 H(15B) 0.26560 0.85410 0.67360

39 H(15C) 0.17520 0.69320 0.65340

**Table S3.** Bond Lengths in Angstroms (with estimated standard deviations in last digit).

| P(1) O(2) | 1.4594(14) | C(8) C(9) | 1.518(3) |
| --- | --- | --- | --- |
| P(1) O(4) | 1.5701(13) | C(9) C(13) | 1.542(3) |
| P(1) O(3) | 1.5774(14) | C(11) C(13) | 1.524(3) |
| P(1) C(9) | 1.8294(18) | C(17) C(18) | 1.504(4) |
| O(3) C(14) | 1.457(2) | C(14) C(16) | 1.459(5) |
| O(4) C(17) | 1.472(3) | C(14) C(15) | 1.496(5) . |
| N(5) C(7) | 1.283(3) | C(17) C(19) | 1.506(4) |
| N(5) O(6) | 1.300(2) | C(7) C(11) | 1.467(3) |
| N(5) C(9) | 1.499(2) |  |  |
| C(17) H(17) | 1.0272 | C(19) H(19B) | 1.0902 |
| C(7) H(7) | 1.0247 | C(19) H(19C) | 1.1454 |
| C(8) H(8A) | 1.0665 | C(18) H(18A) | 1.2211 |
| C(8) H(8B) | 1.1154 | C(18) H(18B) | 1.1064 |
| C(8) H(8C) | 1.0121 | C(18) H(18C) | 1.1482 |
| C(11) H(11A) | 1.0124 | C(15) H(15A) | 0.9518 |
| C(11) H(11B) | 1.0527 | C(15) H(15B) | 0.9577 |
| C(13) H(13A) | 1.0547 | C(15) H(15C) | 0.9633 |
| C(13) H(13B) | 1.1447 | C(16) H(16A) | 0.9609 |
| C(14) H(14) | 1.1259 | C(16) H(16B) | 0.9609 |
| C(19) H(19A | 0.9355 | C(16) H(16C) | 0.9537 |

**Table S4.** Bond/Valence Angles in Degrees (with estimated standard deviations in last digit).

| O(2) P(1) O(4) | 115.06(9) | O(2) P(1) O(3) | 115.96(8) |
| --- | --- | --- | --- |
| O(4) P(1) O(3) | 101.57(8) | O(2) P(1) C(9) | 113.51(9) |
| O(4) P(1) C(9) | 109.72(8) | O(3) P(1) C(9) | 99.36(8) |
| C(14) O(3) P(1) | 119.77(14) | C(17) O(4) P(1) | 122.65(13) |
| C(7) N(5) O(6) | 128.13(18) | C(7) N(5) C(9) | 113.60(17) |
| O(6) N(5) C(9) | 118.24(16) | N(5) C(7) C(11) | 112.74(18) |
| N(5) C(7) H(7) | 118.4 | C(11) C(7) H(7) | 128.8 |
| C(9) C(8) H(8A) | 108.8 | C(9) C(8) H(8B) | 108.1 |
| H(8A) C(8) H(8B) | 113.7 | C(9) C(8) H(8C) | 110.3 |
| H(8A) C(8) H(8C) | 108.5 | H(8B) C(8) H(8C) | 107.4 |
| N(5) C(9) C(8) | 109.47(16) | N(5) C(9) C(13) | 102.41(14) |
| C(8) C(9) C(13) | 113.84(18) | N(5) C(9) P(1) | 106.26(13) |
| C(8) C(9) P(1) | 112.38(13) | C(13) C(9) P(1) | 111.71(12) |
| C(7) C(11) C(13) | 104.74(17) | C(7) C(11) H(11A) | 109.0 |
| C(13) C(11) H(11A) | 114.6 | C(7) C(11) H(11B) | 103.7 |
| C(13) C(11) H(11B) | 107.9 | H(11A) C(11) H(11B) | 115.9 |
| C(11) C(13) C(9) | 106.11(16) | C(11) C(13) H(13A) | 112.1 |
| C(9) C(13) H(13A) | 112.3 | C(11) C(13) H(13B) | 104.0 |
| C(9) C(13) H(13B) | 106.2 | H(13A) C(13) H(13B) | 115.3 |
| O(4) C(17) C(19) | 105.6(2) | O(4) C(17) C(18) | 108.5(2) |
| C(19) C(17) C(18) | 113.3(2) | O(4) C(17) H(17) | 106.8 |
| C(19) C(17) H(17) | 107.1 | C(18) C(17) H(17) | 115.0 |
| O(3) C(14) C(16) | 108.7(3) | O(3) C(14) C(15) | 106.8(3) |
| O(3) C(14) H(14) | 111.6(3) | C(16) C(14) C(15) | 106.5 |
| C(15) C(14) H(14) | 107.7 | C(16) C(14) H(14) | 115.3 |
| C(17) C(19) H(19B) | 105.4 | C(17) C(19) H(19A) | 110.0 |
| C(17) C(19) H(19C) | 105.4 | H(19A) C(19) H(19B) | 114.3 |
| H(19B) C(19) H(19C) | 114.3 | H(19A) C(19) H(19C) | 107.0 |
| C(17) C(18) H(18B) | 106.6 | C(17) C(18) H(18A) | 103.6 |
| C(17) C(18) H(18C) | 104.5 | H(18A) C(18) H(18B) | 110.6 |
| H(18B) C(18) H(18C) | 112.7 | H(18A) C(18) H(18C) | 117.6 |
| C(14) C(15) H(15B) | 108.3 | C(14) C(15) H(15A) | 109.2 |
| C(14) C(15) H(15C) | 109.5 | H(15A) C(15) H(15B) | 110.3 |
| H(15B) C(15) H(15C) | 109.5 | H(15A) C(15) H(15C) | 110.0 |
| C(14) C(16) H(16B) | 111.0 | C(14) C(16) H(16A) | 109.3 |
| C(14) C(16) H(16C) | 107.5 | H(16A) C(16) H(16B) | 109.2 |
| H(16B) C(16) H(16C) | 109.9 | H(16A) C(16) H(16C) | 109.9 |

**Table S5.** Torsion/Dihedral Angles in Degrees (with estimated standard deviations in last digits).[[1]](#endnote-2)

_______________________________________________________________________

O(2) P(1) O(3) C(18) 55.51(17) O(4) P(1) O(3) C(18) -69.98(16)

C(9) P(1) O(3) C(18) 177.52(15) O(2) P(1) O(4) C(16) 32.83(17)

O(3) P(1) O(4) C(16) 158.91(15) C(9) P(1) O(4) C(16) -96.62(16)

O(2) P(1) C(9) N(5) -48.69(14) O(2) P(1) C(9) C(8) -168.41(14)

O(2) P(1) C(9) C(13) 62.23(15) O(3) P(1) C(9) N(5) -172.45(12)

O(3) P(1) C(9) C(8) 67.83(15) O(3) P(1) C(9) C(13) -61.52(14)

O(4) P(1) C(9) N(5) 81.59(13) O(4) P(1) C(9) C(8) -38.13(16)

O(4) P(1) C(9) C(13) -167.49(13) P(1) O(3) C(14) C(15) -121.6(3)

P(1) O(3) C(14) C(16) 117.8(3) P(1) O(4) C(17) C(18) -95.6(2)

P(1) O(4) C(17) C(19) 142.70(16) O(6) N(5) C(7) C(11) 179.0(2)

C(9) N(5) C(7) C(11) 1.0(3) O(6) N(5) C(9) P(1) -65.5(2)

O(6) N(5) C(9) C(8) 56.1(2) O(6) N(5) C(9) C(13) 177.18(18)

C(7) N(5) C(9) P(1) 112.72(17) C(7) N(5) C(9) C(8) -125.7(2)

C(7) N(5) C(9) C(13) -4.6(2) N(5) C(7) C(11) C(13) 3.2(3)

P(1) C(9) C(13) C(11) -107.24(16) N(5) C(9) C(13) C(11) 6.1(2)

C(8) C(9) C(13) C(11) 124.17(19) C(7) C(11) C(13) C(9) -5.8(2)

P(1) O(3) C(14) H(14) 2.08 P(1) O(4) C(17) H(17) 28.92

O(6) N(5) C(7) H(7) -4.43 C(9) N(5) C(7) H(7) 177.56

N(5) C(7) C(11) H(11A) -119.86 N(5) C(7) C(11) H(11B) 116.22

H(7) C(7) C(11) C(13) -172.96 H(7) C(7) C(11) H(11A) 63.99

H(7) C(7) C(11) H(11B) -59.93 H(8A) C(8) C(9) P(1) 60.56

H(8B) C(8) C(9) P(1) -63.42 H(8B) C(8) C(9) N(5) 178.73

H(8B) C(8) C(9) C(13) 64.83 H(8C) C(8) C(9) P(1) 179.44

H(8C) C(8) C(9) N(5) 61.59 H(8C) C(8) C(9) C(13) -52.31

P(1) C(9) C(13) H(13A) 15.57 P(1) C(9) C(13) H(13B) 142.52

N(5) C(9) C(13) H(13A) 128.9 N(5) C(9) C(13) H(13B) -104.11

C(8) C(9) C(13) H(13A) -113.02 C(8) C(9) C(13) H(13B) 13.93

C(7) C(11) C(13) H(13A) -128.74 C(7) C(11) C(13) H(13B) 105.97

H(11A) C(11) C(13) C(9) 113.54 H(11A) C(11) C(13) H(13A) -9.41

H(11A) C(11) C(13) H(13B) -134.70 H(11B) C(11) C(13) C(9) -115.78

H(11B) C(11) C(13) H(13A) 121.27 H(11B) C(11) C(13) H(13B) -4.02

O(3) C(14) C(15) H(15A) 63.86 O(3) C(14) C(15) H(15B) -56.46

O(3) C(14) C(15) H(15C) -175.73 C(16) C(14) C(15) H(15A) -177.4

C(16) C(14) C(15) H(15B) 62.19 C(16) C(14) C(15) H(15C) -57.08

H(14) C(14) C(15) H(15A) -54.18 H(14) C(14) C(15) H(15B) -174.50

H(14) C(14) C(15) H(15C) 66.23 O(3) C(14) C(16) H(16A) 63.58

O(3) C(14) C(16) H(16B) 175.79 O(3) C(14) C(16) H(16C) 55.58

C(15) C(14) C(16) H(16A) 178.93 C(15) C(14) C(16) H(16B) 58.31

C(15) C(14) C(16) H(16C) -61.91 H(14) C(14) C(16) H(16A) 51.37

H(14) C(14) C(16)H(16B) -69.25 H(14) C(14) C(16) H(16C) 170.53

O(4) C(17) C(18) H(18A) -59.86 O(4) C(17) C(18) H(18B) -176.64

O(4) C(17) C(18) H(18C) 63.85 C(19) C(17) C(18) H(18B) -59.78

C(19) C(17) C(18) H(18C) -179.29 H(17) C(17) C(18) H(18A) -179.38

H(17) C(17) C(18) H(18B) 63.84 H(17) C(17) C(18) H(18C) -55.67

O(4) C(17) C(19) H(19A) -57.76 O(4) C(17) C(19) H(19B) 178.47

O(4) C(17) C(19) H(19C) 57.16 C(18)C(17) C(19) H(19A) -176.31

C(18) C(17) C(19) H(19B) 59.92 C(18) C(17) C(19) H(19C) -61.39

H(17) C(17) C(19) H(19A) 55.85 H(17) C(17) C(19) H(19B) -67.92

H(17) C(17) C(19) H(19C) 170.76

1. Klyne & Prelog Convention (Dunitz, p241)-(Excl. Minor Disorder & Embedded Bond Angl. >160. Deg.) [↑](#endnote-ref-2)
